# Supplementary material for: Stabilized recombinant SARS-CoV-2 spike antigen enhances vaccine immunogenicity and protective capacity
Source: PubMed Central journal article supplement (PMC9754005; doi:10.1172/jci159895), 2022-12-15
Supplement: jci-132-159895-s033.pdf [file jci-132-159895-s033.pdf]

1 **Supplemental Methods, Tables, and Figures**

2

3 Supplement to:

4 Stabilized recombinant SARS-CoV-2 spike antigen enhances vaccine immunogenicity and  
5 protective capacity

6

7 **Supplemental Materials & Methods**

8 **Cell cultures.**

9 DF-1 cells (ATCC® CRL-12203™) were maintained in VP-SFM medium (Thermo Fisher  
10 Scientific), 2% heat-inactivated fetal bovine serum (FBS) (Thermo Fisher Scientific) and 2%  
11 L-glutamine (Thermo Fisher Scientific). Primary chicken embryonic fibroblasts (CEF) were  
12 prepared from 10 to 11-day-old chicken embryos (SPF eggs, VALO) using recombinant trypsin  
13 (Tryple™, Thermo Fisher Scientific) and maintained in VP-SFM medium, 10% FBS and 1%  
14 L-glutamine. Vero cells (ATCC® CCL-81™), Vero E6 cells (ATCC® CRL-1586™), Human  
15 HaCat cells and Huh7 cells (CLS Cell Lines Service GmbH) were maintained in Dulbecco's  
16 Modified Eagle's Medium (DMEM), 10% FBS and 1% MEM non-essential amino acid  
17 solution (Sigma-Aldrich). Human A549 cells (ATCC® CCL-185™, LGC standards) were  
18 maintained in DMEM with high glucose and 10% FBS. Human HeLa cells (ATCC® CCL-2)  
19 were maintained in Minimum Essential Medium Eagle (MEM) (Sigma-Aldrich), 7% FBS and  
20 1% MEM non-essential amino acid solution.

21 **Plasmid construction.**

22 The coding sequence of the full-length SARS-CoV-2 S protein was modified in silico by  
23 introducing silent mutations to remove runs of guanines or cytosines and termination signals of

24 vaccinia virus-specific early transcription. Five mutations (R682G, R683S, R685S, K986P and  
25 V987P) were introduced to obtain the pre-cleaved stabilized spike sequence (SARS-2-ST). The  
26 modified SARS-2-ST cDNA was produced by DNA synthesis (Eurofins) and cloned into the  
27 MVA transfer plasmid pIIIH5red under transcriptional control of the synthetic vaccinia virus  
28 early/late promoter PmH5 to obtain the MVA expression plasmid pIIIH5red-SARS-2-ST.

### 29 **Generation and characterization of the candidate vaccine MVA-SARS-2-ST.**

30 To achieve stabilization of the SARS-2 spike protein, we inactivated the furin cleavage site  
31 (RRAR682–685GSAS) and added proline substitutions in the loop between the first heptad  
32 repeat (HR1) and the central helix (K986P, V987P) as previously established (1, 2)  
33 (Supplemental Figure 1A). cDNA containing the optimized gene sequence encoding for  
34 stabilized SARS-CoV-2-S (SARS-2-ST) from the virus isolate Wuhan HU-1 (GenBank  
35 accession no. MN908947.1) (Supplemental Figure 1B) was placed under the transcriptional  
36 control of the enhanced synthetic vaccinia virus early/late promoter PmH5 in the MVA vector  
37 plasmid pIIIH5red-SARS-2-ST, and introduced by homologous recombination into deletion  
38 site III in the MVA genome (Supplemental Figure 1C). MVA (clonal isolate MVA-F6-sfMR)  
39 was grown on CEF under serum-free conditions and served as a non-recombinant backbone  
40 virus to construct MVA vector viruses expressing the SARS-CoV-2-ST gene sequences.  
41 Briefly, monolayers of 90-95% confluent DF-1 cells were grown in six-well tissue culture plates  
42 (Sarstedt), infected with non-recombinant MVA at 0.05 multiplicity of infection (MOI), and  
43 transfected with plasmid pIIIH5red-SARS-2-ST DNA using X-tremeGENE HP DNA  
44 Transfection Reagent (Roche Diagnostics) according to the manual. Afterwards, cell cultures  
45 were collected and recombinant MVA viruses were clonally isolated by serial rounds of plaque  
46 purification on DF-1 cell monolayers monitoring for transient co-production of the red  
47 fluorescent marker protein mCherry. To obtain vaccine preparations, the resulting recombinant  
48 MVA-SARS-2-ST (MVA-ST) was amplified on DF-1 cell monolayers grown in T175 tissue

49 culture flasks, purified by ultracentrifugation through 36% sucrose and reconstituted to high  
50 titer stock preparations in Tris-buffered saline pH 7.4. Plaque-forming units (PFU) were  
51 counted to determine viral titers. The virus was purified and quality controlled according to  
52 standard procedures for generating recombinant MVA vaccines (3). During repetitive plaque  
53 purification using transient coproduction of the fluorescent marker protein mCherry to screen  
54 for red fluorescent cell foci, we analyzed the genetic integrity and stability by PCR using  
55 oligonucleotide primers to confirm MVA identity (PCR of the six major deletion sites of MVA  
56 in MVA-ST; Supplemental Figure 1, D-F) and correct insertion of stabilized S gene sequences  
57 within the MVA deletion site III (Supplemental Figure 1G). To evaluate growth behavior, we  
58 infected permissive DF-1 cells and non-permissive human cells (HaCat, HeLa and A549) and  
59 analyzed viral load as established before. As expected, recombinant MVA-ST replicated  
60 efficiently in the avian cell line (DF-1) but not in cells of mammalian origin (HaCat, HeLa and  
61 A549) (Supplemental Figure 2).

#### 62 **Western blot analysis of recombinant protein.**

63 DF-1 cells were infected at MOI 10 with recombinant or non-recombinant MVA or remained  
64 uninfected (mock). At indicated time points of infection, cell lysates were prepared from  
65 infected cells and stored at -80°C. Proteins from lysates were separated by electrophoresis on a  
66 SDS-10% polyacrylamide gel (SDS-PAGE, Bio-Rad) and subsequently transferred to a  
67 nitrocellulose membrane by electroblotting. The blots were blocked in a phosphate buffered  
68 saline (PBS) buffer containing 5% nonfat dried milk powder (PanReac AppliChem) and 0.1%  
69 Tween-20 (Sigma-Aldrich) and incubated overnight with primary antibodies targeting S1  
70 (Genetex, Cat-No. GTX635654, clone HL6, 1:2000) or S2-domain (GeneTex, Cat-No.  
71 GTX632604, clone 1A9, 1:4000). Next, membranes were washed with 0.1% Tween-20 in PBS  
72 and incubated with anti-mouse (Agilent Dako, Cat-No. P044701-2, 1:5000) or anti-rabbit IgG  
73 (Cell Signaling, Cat-No. 7074, 1:5000), conjugated to horseradish peroxidase. Blots were

74 washed and developed using SuperSignal® West Dura Extended Duration substrate (Thermo  
75 Fisher Scientific, Cat-No. 34075) in ChemiDoc MP Imaging System (Bio-Rad).

#### 76 **Immunofluorescence staining of recombinant SARS-2-ST protein.**

77 To confirm S protein cell surface expression and trafficking, Vero cells were infected with 0.05  
78 MOI MVA-SARS-2-S/2-ST or MVA and incubated at 37°C. After 24 h, cells were fixed with  
79 4% paraformaldehyde (PFA) for 10 min on ice, washed two times with PBS, and when  
80 indicated permeabilized with 0.1% Triton X-100 (Sigma-Aldrich) in PBS. Cells were stained  
81 with a mouse monoclonal antibody obtained against the S2 protein (SARS-1-S, GeneTex, Cat-  
82 No. GTX632604, clone 1A9, 1:200) before fixation with PFA. Polyclonal goat anti-mouse  
83 secondary antibody (Life Technologies, Cat-No. A-11017, 1:1000) was used to visualize S2-  
84 specific staining by green fluorescence. Nuclei were stained with 1 µg/ml of 4,6-diamidino-2-  
85 phenylindole (DAPI) (Sigma-Aldrich, Cat-No. D9542) and cells were analyzed using the  
86 Keyence BZ-X700 microscope (Keyence) with a ×100 objective.

#### 87 **Vaccination experiments in mice and hamsters.**

88 Female BALB/c mice (BALB/cAnNCrl, inbred, 6 to 10 weeks old) were purchased from  
89 Charles River Laboratories (Sulzfeld, Germany). Male Syrian hamsters (10 week-old,  
90 Mesocricetus auratus; breed RjHan:AURA) were purchased from Janvier Labs (Saint  
91 Berthevin, France). K18-hACE2 mice (034860-B6.Cg-Tg(K18-ACE2)2Prlman/J, on the  
92 C57BL/6 background, 6-8 weeks old, 50:50 males:females) were purchased from The Jackson  
93 Laboratory (Bar Harbor, USA). Hamsters and mice were maintained under specified pathogen-  
94 free conditions, had free access to food and water, and were allowed to adapt to the facilities  
95 for at least one week before vaccination experiments were performed. Immunizations were  
96 performed using intramuscular applications with vaccine suspension containing 10<sup>8</sup> PFU  
97 recombinant MVA-SARS-2-S/2-ST, MVA or PBS (mock) into the quadriceps muscle of the  
98 left hind leg. Boost vaccinations were performed 21 days later.

99 Blood was collected on days 0, 18, 35 for the BALB/c mice, on days 0, 21, 42 and 55 for the  
100 hamsters and on days 0, 18, 31, 55 or 57 for the K18-hACE mice. Coagulated blood was  
101 centrifuged at 1300×g for 5 min in serum tubes (Sarstedt AG&Co.) to separate serum, which  
102 was stored at -80 °C until further analysis.

### 103 **Ethics statement.**

104 All animal experiments were handled in compliance with the European and national regulations  
105 for animal experimentation (European Directive 2010/63/EU; Animal Welfare Acts in  
106 Germany) and Animal Welfare Act, approved by the Regierung von Oberbayern (Munich,  
107 Germany) and by the Niedersächsisches Landesamt für Verbraucherschutz und  
108 Lebensmittelsicherheit (LAVES, Lower Saxony, Germany).

### 109 **Antigen-specific IgG ELISA.**

110 SARS-2-S-specific serum IgG titers were measured by ELISA as described previously (4).  
111 ELISA plates (Nunc MaxiSorp Plates, Thermo Fisher Scientific) were coated with 50 ng/well  
112 recombinant SARS-CoV-2 spike, S1, S2 and receptor binding domain (RBD) protein (from  
113 AcroBiosystems and The Native Antigen Company, Supplemental Table 1) overnight at 4°C.  
114 Plates were washed and then blocked with blocking buffer containing 1% BSA and 0.15 M  
115 sucrose (both Sigma-Aldrich) dissolved in PBS. Plates were then probed with sera serially  
116 diluted 3-fold in PBS containing 1% BSA (PBS/BSA), starting at a dilution of 1:100, and then  
117 probed with goat anti-mouse IgG HRP (Agilent Dako, Cat-No. P044701-2, 1:2000) or goat  
118 anti-hamster IgG (H+L)-HRP (SouthernBiotech, Cat-No. 6060-05, 1:6000) diluted in  
119 PBS/BSA. Bound antibody was visualized by adding 3'3', 5'5'-Tetramethylbenzidine (TMB)  
120 Liquid Substrate System for ELISA (Sigma-Aldrich) followed by Stop Reagent for TMB  
121 Substrate (450 nm, Sigma-Aldrich) after a color change was observed. The absorbance was  
122 measured at 450 nm with a 620 nm reference wavelength using the Sunrise™ microplate reader  
123 (Tecan Trading AG). ELISA data were normalized using the positive control. The cut-off value

124 for positive mouse serum samples was determined by calculating the mean of the normalized  
125 OD 450 nm values of the PBS control group sera plus 6 standard deviations (mean + 6 SD).

#### 126 **T cell analysis by Enzyme-Linked Immunospot (ELISPOT).**

127 At day 14 post prime-boost vaccination, mice were sacrificed and splenocytes were prepared.  
128 Splenocytes were washed and resuspended in RPMI-10 (Sigma-Aldrich). ELISPOT assays  
129 (Mabtech ELISpot kit for mouse IFN- $\gamma$ , Biozol) were performed following the manufacturer's  
130 instructions. Briefly,  $2 \times 10^5$  splenocytes/100  $\mu$ l were seeded in 96-well plates and stimulated  
131 with individual peptides (2  $\mu$ g/ml RPMI-10). Non-stimulated cells and cells stimulated with  
132 phorbol myristate acetate (PMA) /Ionomycin (Sigma-Aldrich) or vaccinia virus peptide  
133 SPGAAGYD (F2(G)<sub>26-34</sub>; H-2L<sup>d</sup>; (5)) served as controls. After 37°C for 48 h, plates were  
134 stained according to the manufacturer's instructions. Spots were counted and analyzed using an  
135 automated ELISPOT plate reader and software (A.EL.VIS Eli.Scan, A.EL.VIS  
136 ELISPOTAnalysis Software, Hannover, Germany).

#### 137 **T cell analysis by Intracellular Cytokine Staining (ICS).**

138 ICS methods were described previously (4). Briefly, splenocytes were diluted in RPMI-10 and  
139 plated onto 96-well U-bottom plates using  $10^6$  cells/well. Cells were stimulated with 8  $\mu$ g/ml  
140 S<sub>268-276</sub> (GYLQPRFTFL) peptide or vaccinia virus peptide F2(G)<sub>26-34</sub> (SPGAAGYD) to analyze  
141 SARS-2-S- or MVA-specific CD8<sup>+</sup> T cells. PMA plus ionomycin served as positive controls  
142 and RPMI alone was used as a negative control. After 2 h at 37°C, brefeldin A (Biolegend) was  
143 added according to the manufacturer's instructions and stimulated cells were further maintained  
144 for 4 h at 37°C. After stimulation, cells were stained extracellularly with anti-mouse CD3  
145 phycoerythrin (PE)-Cy7 (Biolegend, clone 17A2, 1:100), anti-mouse CD4 Brilliant Violet 421  
146 (Biolegend, clone GK1.5, 1:600), anti-mouse CD8 $\alpha$  Alexa Fluor 488 (Biolegend, clone 53-6.8,  
147 1:300), and purified CD16/CD32 (Fc block; Biolegend, clone 93, 1:500). Cells were then  
148 stained with the fixable dead cell viability dye Zombie Aqua (Biolegend, Cat-No. 423101,

149 1:800) and fixed using Fixation Buffer (Biolegend) and permeabilised using Intracellular  
150 Staining Permeabilization Wash Buffer (Biolegend) according to the manufacturer's protocol.  
151 Samples were stained intracellularly with anti-mouse IFN- $\gamma$  (Biolegend, clone XMG1.2, 1:200)  
152 plus anti-mouse TNF- $\alpha$  (Biolegend, clone MP6-XT22, 1:200). Data was acquired by the  
153 MACSQuant VYB Flow Analyser (Miltenyi Biotec) and analyzed using FlowJo (FlowJo LLC,  
154 BD Life Sciences).

#### 155 **Real-time PCR to detect SARS-CoV-2.**

156 RNA was extracted from lung tissue samples using Qiampr Viral RNA Mini Kit (Qiagen) and  
157 eluted in 30  $\mu$ l of RNase-free water (Sigma GmbH) according to the manufacturer's protocol.  
158 For SARS-CoV-2 RNA amplification, the commercially available AgPath-IDTM One-Step  
159 RT-PCR kit (Thermo Fisher Scientific) in a CFX96-Touch Real-Time PCR system (Bio-Rad)  
160 was used. The RT-qPCR assay specific for the RdRp gene of SARS-CoV-2 and recommended  
161 by the WHO, were used: SARS-2-IP4, forward primer (5'- GGT AAC TGG TAT GAT TTC G  
162 -3'), reverse primer (5'- CTG GTC AAG GTT AAT ATA GG-3') and probe (5'-TCA TAC  
163 AAA CCA CGC CAG G-3' [5']FAM [3']BHQ-1)]. The PCR program included reverse  
164 transcription at 50°C for 20 min; denaturation at 95°C for 10 min; 50 cycles of 95°C for 15 sec  
165 (denaturation), and 58°C for 45 sec (annealing and elongation). The relative fluorescence units  
166 (RFU) were measured at the end of the elongation step. The sample Ct value was correlated to  
167 a standard RNA transcript and the quantity of viral RdRp copy numbers per  $\mu$ l of total RNA  
168 was calculated.

#### 169 **Histological evaluation of lung pathology in hamsters and mice.**

170 Left lung lobes were fixed by instillation and immersion in 10% buffered formalin (6). Tissues  
171 were subsequently embedded in paraffin and cut into 2-3  $\mu$ m thick sections. Lesions were  
172 evaluated on hematoxylin and eosin (HE) stained sections in a blinded fashion with a  
173 semiquantitative scoring system. Briefly, the evaluation included assessment of alveolar lesions

174 (inflammation, regeneration, necrosis/desquamation and loss of alveolar cells, atypical  
175 large/syncytial cells, intraalveolar fibrin, alveolar edema, hemorrhage), airway lesions  
176 (inflammation, necrosis, hyperplasia) and vascular lesions (vasculitis, perivascular cuffing,  
177 edema, and hemorrhage). The total scores reflect the sum of all scores in the respective  
178 category. Details on the scoring system have been described previously (7).

#### 179 **Immunohistochemistry to detect SARS-CoV-2 antigen.**

180 Detection of SARS-CoV-2 nucleocapsid protein was performed on formalin-fixed, paraffin-  
181 embedded lung tissue using a monoclonal mouse antibody (Sino Biological, Cat-No. 40143-  
182 MM05) and the Dako EnVision+ polymer system (Dako Agilent Pathology Solutions) as  
183 described previously (7). Evaluation was performed semiquantitatively (0 = no antigen; 1 =  
184 minimal, single foci, less than 1%; 2 = mild, 2-25%; 3 = moderate, 26-50%; 4 = severe, 51-  
185 75%; 5 = subtotal, >75% of tissue affected).

186

187

188

189

190

191

192

193

194

195



196 **Supplemental Table 1. Recombinant SARS-CoV-2 S proteins used for ELISA.**

| <b>Recombinant Protein</b>                       | <b>Company</b>             | <b>Catalogue No.</b> |
|--------------------------------------------------|----------------------------|----------------------|
| SARS-CoV-2 S protein, His Tag                    | ACROBiosystems             | SPN-C52H4            |
| SARS-CoV-2 (COVID-19) S1 protein, His Tag        | ACROBiosystems             | S1N-C52H3            |
| SARS-CoV-2 Spike Glycoprotein (S2), Sheep Fc-Tag | The Native Antigen Company | REC31807-500         |
| SARS-CoV-2 (COVID-19) S protein RBD, His Tag     | ACROBiosystems             | SPD-C52H3            |

197

198

199

200

201

202

203

204

205

206

207

208

209 **Supplemental Table 2. Clinical Scores used for evaluation of SARS-CoV-2 infected**  
 210 **animals.**

| <b>Clinical Scores</b>                          | <b><u>Body weight</u></b>                                               | <b><u>Cardiovascular system</u></b>                                             | <b><u>Fur/ skin condition</u></b>                   | <b><u>Lower respiratory tract</u></b>                   | <b><u>Upper respiratory tract</u></b>                                                                                       | <b><u>Environment</u></b> | <b><u>Social behaviour/ general condition/ locomotion</u></b>                                         | <b><u>Neurological scoring</u></b>                      |
|-------------------------------------------------|-------------------------------------------------------------------------|---------------------------------------------------------------------------------|-----------------------------------------------------|---------------------------------------------------------|-----------------------------------------------------------------------------------------------------------------------------|---------------------------|-------------------------------------------------------------------------------------------------------|---------------------------------------------------------|
| <b>Symptoms</b><br>(mild to moderate to severe) | <5% weight loss                                                         | normal                                                                          | normal fur                                          | normal                                                  | mild serous ocular or nasal discharge                                                                                       | normal                    | normal stimulus response (attentive, curious)                                                         | normal                                                  |
|                                                 | 5-10% weight loss                                                       | reduced skin turgor/ mild enophthalmia ("sunken eyes")/ mild dehydration        | slightly ruffled fur                                | mild tachypnoea (low abdominal respiration)             | moderate serous to mucous ocular or nasal discharge                                                                         | Rummaged bedding          | suppressed eating, drinking, or running, (tired) or nervous/ hyperactive or lack of nesting behaviour | reduced physical activity                               |
|                                                 | 11-15% weight loss                                                      | moderate to severe dehydration/ moderate to severe enophthalmia ("sunken eyes") | ruffled fur                                         | moderate tachypnoea (significant abdominal respiration) | moderate mucous to purulent ocular or nasal discharge                                                                       | soft feces                | unusual behaviour, fearful, hiding in houses                                                          | mild neurological symptoms                              |
|                                                 | 16-20% weight loss                                                      | reduced body temperature, acrocyanosis                                          | ruffled fur, puffy appearance and piloerection      | dyspnoea (significant)                                  | severe mucous to purulent ocular or nasal discharge                                                                         | diarrhea                  | depressed, reduced interaction with other animals/ apathetic, slowed stimulus response                | moderate neurological symptoms,                         |
|                                                 | acute weight loss $\geq 20\%$ compared to initial weight ( $\leq 24h$ ) | circulatory shock                                                               | severe/ extensive lesions, severe skin inflammation | cold pale mucosa                                        | swollen eye area, eye and nose openings clotted by secretion, or purulent inflammations of the connective tissue of the eye | hemorrhagic diarrhea      | apathy/ lethargy                                                                                      | ataxia, paralysis, tremors, convulsions, circle walking |

211

212 **Supplemental References**

- 213 1. Pallesen J, et al. Immunogenicity and structures of a rationally designed prefusion  
214 MERS-CoV spike antigen. *Proc Natl Acad Sci U S A*. 2017;114(35):E7348-e57.
- 215 2. Bos R, et al. Ad26 vector-based COVID-19 vaccine encoding a prefusion-stabilized  
216 SARS-CoV-2 Spike immunogen induces potent humoral and cellular immune  
217 responses. *NPJ Vaccines*. 2020;5:91.
- 218 3. Kremer M, et al. Easy and efficient protocols for working with recombinant vaccinia  
219 virus MVA. *Methods Mol Biol*. 2012;890:59-92.
- 220 4. Tscherne A, et al. Immunogenicity and efficacy of the COVID-19 candidate vector  
221 vaccine MVA-SARS-2-S in preclinical vaccination. *Proc Natl Acad Sci U S A*.  
222 2021;118(28).
- 223 5. Tschärke DC, et al. Poxvirus CD8+ T-cell determinants and cross-reactivity in BALB/c  
224 mice. *J Virol*. 2006;80(13):6318.
- 225 6. Meyerholz DK, et al. Approaches to Evaluate Lung Inflammation in Translational  
226 Research. *Vet Pathol*. 2018;55(1):42-52.
- 227 7. Bošnjak B, et al. Intranasal Delivery of MVA Vector Vaccine Induces Effective  
228 Pulmonary Immunity Against SARS-CoV-2 in Rodents. *Front Immunol*.  
229 2021;12:772240.

230

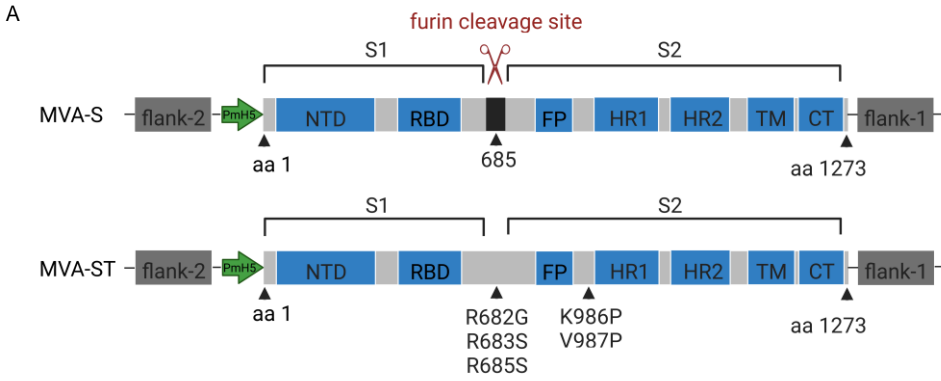

**Supplemental Figure 1. Construction and characterization of MVA-S and MVA-ST.** (A) Schematic representation of the recombinant spike proteins expressed by MVA-S or MVA-ST; NTD, N-terminal domain; RBD, receptor binding domain; FP, fusion peptide; HR1, heptad repeat 1; HR2, heptad repeat 2; TM, transmembrane domain; CT, C-terminal domain. MVA-S produces the native SARS-CoV-2 spike protein containing the furin cleavage site for proteolytical processing of the S1 and S2 subdomains. MVA-ST encodes for the same SARS-CoV-2-S protein but contains the five indicated amino acid exchanges for pre-fusion stabilization. Created with BioRender.com.

**B**

```

5' TAGGTTTAAACACCATTGTTGGTTTCCTTGTTTTATTGCCACTAGTCTCTAGTCAGTGTGTTAATCTTACAACCCAGAACAATTAACCCCTGCATACACTAATTTCTTACACAGTGGTGTATTTACCCCTGACAAGTTTTCAGATCCTCAGTTFITACA
160
TTCACCTCAGGACTTGTCTTACCTTCTTCCAAATGTTACTTGGTCCATGCTATACATGCTCTGGGACCAATGGTACTAAGAGGTTGATAACCCCTGCTCACCATTAAATGATGGTGTATTTTGGCTCCACTGAGAAGTCTAACATAATAAGA
320
GGCTGGATCTTGGTACTACTTTAGATTGGAAGACCCAGTCCCTACTTATTGTTAATAACCGCTACTAATGTTGTTAATAAGCTGCGAATTTCAATTTGTAATGATCCATCTCTGGGTGTTTATTACACAAGAACAACAAGAGTTGGATGGAAAGTG
480
AGTTCAGAGTTTATTCTAGTGGGAATAATGCACCTTTGAATATGCTCTCAGCCCTTTCTTATGGACTTGAAGGAAACAGGGTAATTTCAAAAATCTTAGGGAATTTGTGTTAAGAATATTGATGGTTATTTTAAAATATATTCTAAGCACAGCC
640
TATTAATTTAGTGCATCTCCCTCAGGTTTTTTCGGCTTTAGAACCAATTTGGATATTTGCCAATAGTATTAACATCACTAGGTTTCAACCTTACTTGCCTTACATAGAATTTATTTGACTCCTGGTGATTCTTCTCAGTGTGCAGAGCTGGTGCT
800
GCAGCTTATTATGGGTTATCTTCAACCTAGGACTTTCTTATTAATAATAATGAAATGGAACCAATTACAGATGCTGTAGACTGTGCACCTGACCCTCTCAGAAAACAAGTGTACGTTGAAATCTTCACTGTAGAAAAGGAATCTATCAAACTT
960
CTAACTTTAGAGTCCCAACCAAGAACTTATTTGTAGATTTCCATAATTACAACCTTGGCCCTTTGGTGAAGTTTCAACGCCACAGATTTGCATCTGTTTATGCTTGAACAGGAAGAGAATCAGCAACTGTGTGCTGATTATTTCTGCTCCTATA
1120
TAATTCGGCATCATTTCCCACTTTAAGTGTATGAGGTGTCTCTCACTAAATTAATGATCTCTGCTTACTAATGCTCTATCGAGATTCATTTGTAATTAGAGGTGATGAAGTCAGACAATCGCTCCAGGGCAAACTGGAAGATTTGCTGATTATAAT
1280
TATAAATACCAAGATTTTACAGCGTGGCTTATAGCTTGGAACTTCAACAATCTGATTTCTAAGTGGTGGTAAATAATAATACCTGTATAGATTGTTTGAAGAGTCTAACTCAAACTTTGAGAGAGATTTCAACTGAAATCTATCAGGCGC
1440
GTAGCACACCTTGAATGGTGTGAAGGTTTAAATTTGTTACTTCCCTTACAATCATATGGTTTCCAACCCACTAATGGTGGTGGTTTACCAACCATACAGAGTAGTAGTACTTCTTTTGAACTCTACATGCACCCAGCAACTGTTTGGGACCTAAA
1600
GTCTACTAATTTGGTTAAGAACAATGTGCTAATTTCAACTCAATGGTTTAAACAGGCACAGGTGTTCTACTAGCTTAAACAAGAATTTTGCCTTCCAAACAATTTGGCAGAGACATGCTGCACACTACTGATGCTGCTCCGTATCCACAGACACTT
1760
GAGATCTTGACATTACACCATGTTCTTTGGTGGTGCAGTGTATAACACAGGAACAATACTTCAACAGGTTGCTGTTCTTATCAGGATGTAAGTGCACAGAAGTCCCTGTTGCTATTCATGCAGATCAACTTACTCCTACTTGGCGTGT
1920
ATTCTACAGTTCTAATGTTTCCAAACACGTGCAGGCTGTTAATAGGGGCTGAACATGTCAACCACTCATATGAGTGTACATACCCATTTGGTGCAGTATATGCGCTAGTTATCAGACTCAGACTAATTTCTCTGGATCAGCAAGTAGTGTAGCTAG
2080
TCAATCCATGATGCCACACTATGCTACTTGGTGCAGAAAATTCAGTTGCTACTTAATAACTTATTGCCATACCCACAATTTACTATTAGTGTACCACAGAATTTACACAGTGTCTATGACCAAGACATCAGTAGATTGTACAATGTACATT
2240
TGTGGTATTCAACTGAATGCAGCAATCTCTGTTGCAATATGGCAGTTTTCGTACACAATTAACCGTGCCTTAACTGGAATAGCTGTGAAACAAGCAAAACACCAAGAAAGTTTTCGCAAGTCAAAACAATTTACAAAACACCACCAATTAAG
2400
ATTTGGTGGTTTTAATTTTACAAATATTACCAGATCCATCAAAACCAAGCAAGAGGTCATTTAATGAGATCTACTTTTCAACAAGTGACACTTGCAGATGCTGGCTCATCAACAATATGGTATTGCTTGGTGATATTGCTGTAGAGACT
2560
CATTTGCGACAAGATTTAAGGGCTTACTGTTCTGCCCACCTTTCGCTCAGAGATGAATGATTGCTCAATACACTTTCGACTGTTAGGGGTACAACTCCTCTGGTGGACCTTTGGTGCAGGTGCTGCATTACAAATACCATTGCTTATGCAAAATG
2720
GCTTATAGTTTTAAGGTATTGGAGTTACACAGAAATGTTCTCTATGAGAACCAAAAATGATTGCCAACCAATTAATAGTGTCTTGGCAAAAATCAAGACTCACTTTCTCCACAGCAAGTCACTTGGAAAACCTCAAGATGGTGGTCAACCAAAATG
2880
CACAACTTTAAACACGCTGTTTAAACAACCTTAGCTCCAATTTTGGTGAATTTCAAGTGTTTAAATGATATCCCTTACAGCTTGCACCCACTGAGGCTGAAGTGCAAAATGATAGGTTGATCAGAGGACACTTCAAAGTTTGCAGACATATGTGAC
3040
TCAACAATTAATAGAGCTGCAGAAATCAGAGCTTCTGCTAACTTGTCTGCTACTAAATGTCAAGTGTGACTTGGCAATCAAGAGAGTTGATTTCTGTGAAAGGGCTATCATCTTATGCTCTCCCTCAGTCAGCACTCATGGTGTAGTCTTC
3200
TTGATGAGTACTTATGCTCCCTGCAGAAAAGAACTTCAACAACCTCTCTGCCATTTGTCATGATGAAAAGCACACTTTCTCGTGAAGTGTCTTGTGTTCAAAATGGCACACACTGGTTTGTAAACAAGAAATTTTCAATGAACCAACAATCATTA
3360
CTACAGACACACATTTGTTGTTGTTAAGTGTSTAAATAGSAAATGTCAACAACACAGTTTATGATCCTTTGCAACCTGAATTAGACTCAATCAAGGAGGATAGATAAATTTTAAAGAATCATACATCACCAGATGTTGATTTAGTGTGACAT
3520
CTCTGGCATTAAATGCTTCAAGTTGAAACATTTCAAAGGAAATTTGACCCCTCAATGAGGTTGCCAAGAAATTAATGAATCTCTCATGATCTTCCAAGAACTTGAAGAGTATGAGCAGTATATAAATGGCCATGATACATTGGTCAAGTTTATAGCT
3680
GGCTTGATGCCATAGTAATGGTGAACAATATGCTTGTCTGATGACCAAGTGTCTGTATGCTCTCAAGGCTGTGTTCTTGGATCCTGCTGCAAAATTTGATGAAGAGCACTGTAGCCAGTCTCAAAGGATCAAAATACATTTACATCATGATTAAT
3840
GAGCGCCGCGTA
+-----+

```

(B) DNA sequence of the modified SARS-2-ST. Green line shows the sequence for start signal (ATG) and red line shows the sequence for the stop signal (TAATGA).

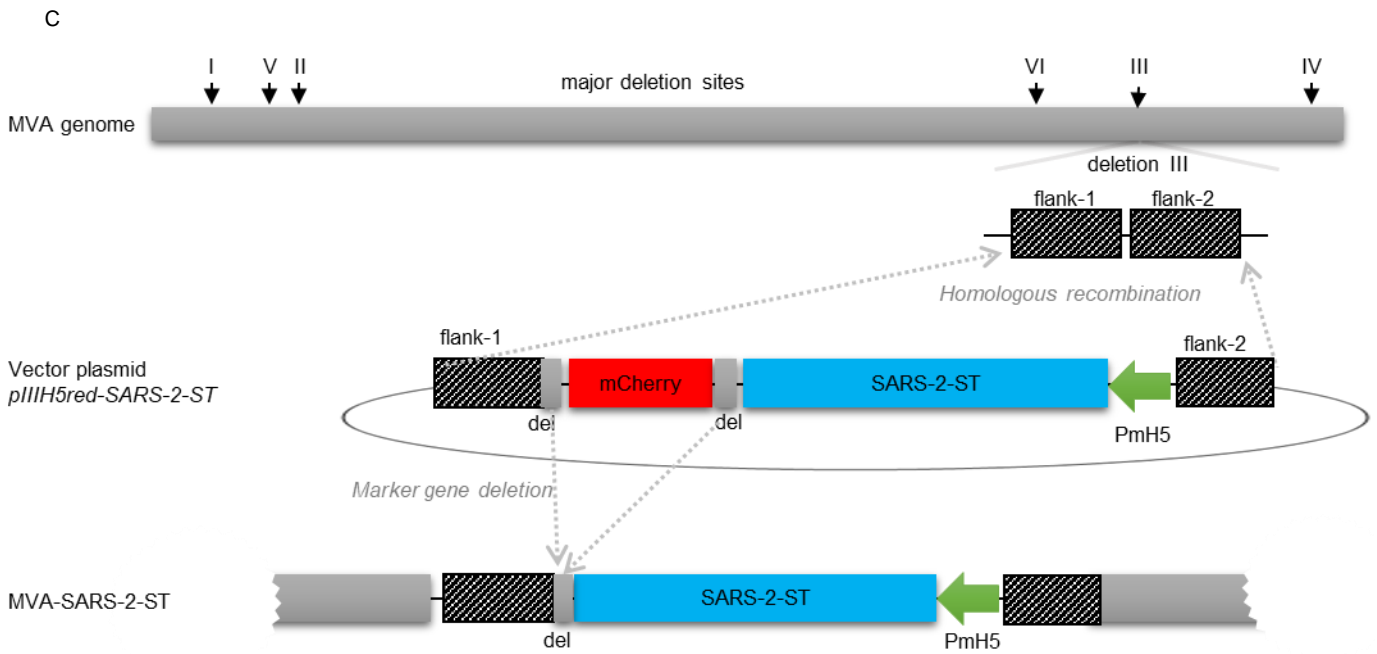

(C) Schematic diagram of the MVA genome with the major deletion sites I to VI. A modified version of the spike protein of SARS-CoV-2 isolate Wuhan-HU-1 (SARS-2-ST) was inserted into deletion III and placed under transcriptional control of the vaccinia virus promoter PmH5. Insertion occurred via homologous recombination between MVA DNA sequences (flank-1 and flank-2) adjacent to deletion site III in the MVA genome and copies cloned in the vector plasmid. MVA-ST was isolated by plaque purification screening for co-production of the red fluorescent marker protein mCherry. A repetition of short flank-1 derived DNA sequences (del) served to remove the marker gene by intragenomic homologous recombination (marker gene deletion).

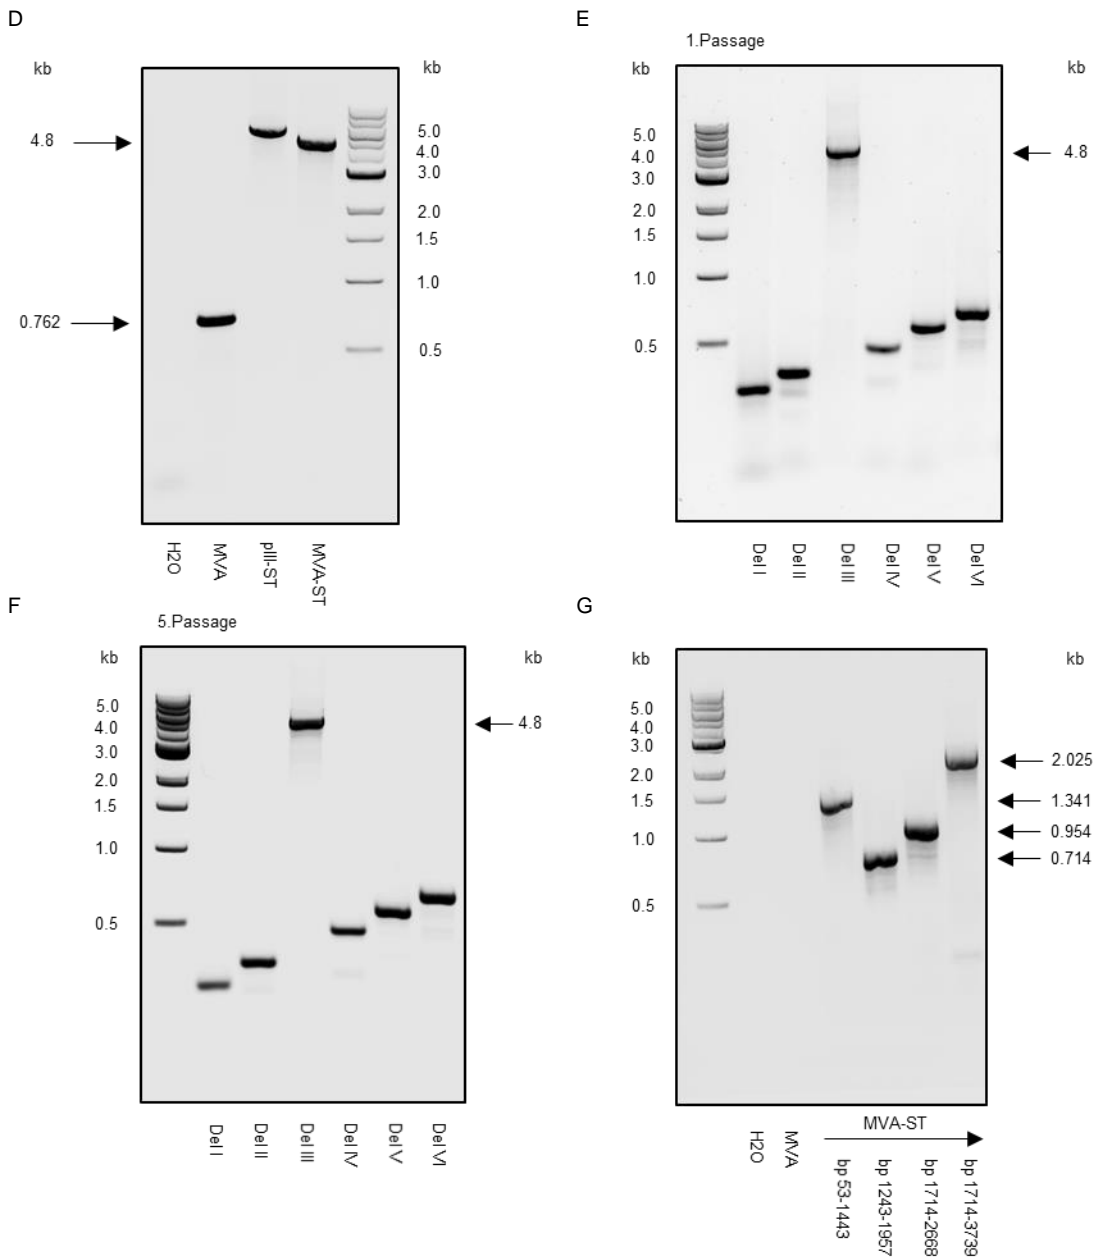

**(D)** Genetic integrity of MVA-ST. PCR analysis of genomic viral DNA confirmed the stable insertion of the SARS-2-ST sequence into deletion site III of the MVA genome. The precise intragenomic deletion of the marker gene mCherry during plaque purification was revealed by amplification of a PCR product with the expected molecular weight (4.8 kb) from MVA-ST genomic DNA compared to pIII5red-SARS-2-ST plasmid DNA template (pIII-ST). From the deletion III site-specific oligonucleotide primers allowed for amplification of a characteristic 0.762 kb DNA fragment from genomic DNA of non-recombinant MVA. **(E and F)** Genetic stability of MVA-ST after serial growth amplification in DF-1 cell cultures. DF-1 cells were infected with MVA-ST at MOI of 0.05 and incubated for 48 h. Subsequently, the amplified virus was harvested and used to re-infect fresh DF-1 cells at MOI of 0.05 for 48 h. This procedure was performed five times. MVA-ST genetic stability was tested by PCR analysis of genomic viral DNA and monitored for recombinant gene expression by S-specific immunostaining. PCR analysis demonstrated genetic stability for six loci in the MVA-ST genome (deletion sites Del I-VI) including the heterologous SARS-2-ST gene sequences inserted into the site of deletion III (Del III) with the amplification of characteristic size DNA fragments from viral DNA prepared after the first or fifth round of MVA-ST amplification in DF-1 cultures. **(G)** Four different PCRs were used to assess the integrity of the SARS-2-ST gene sequence inserted in the MVA-ST genome. Specifically amplified DNA fragments demonstrated the expected molecular weight of 1.341 kb (specific for S nucleotides 53-1443), 0.714 kb (specific for S nucleotides 1243-1957), 0.954 kb (specific for S nucleotides 1714-2668) and 2.025 kb (specific for S nucleotides 1714-3739) from the SARS-2-ST gene sequence.

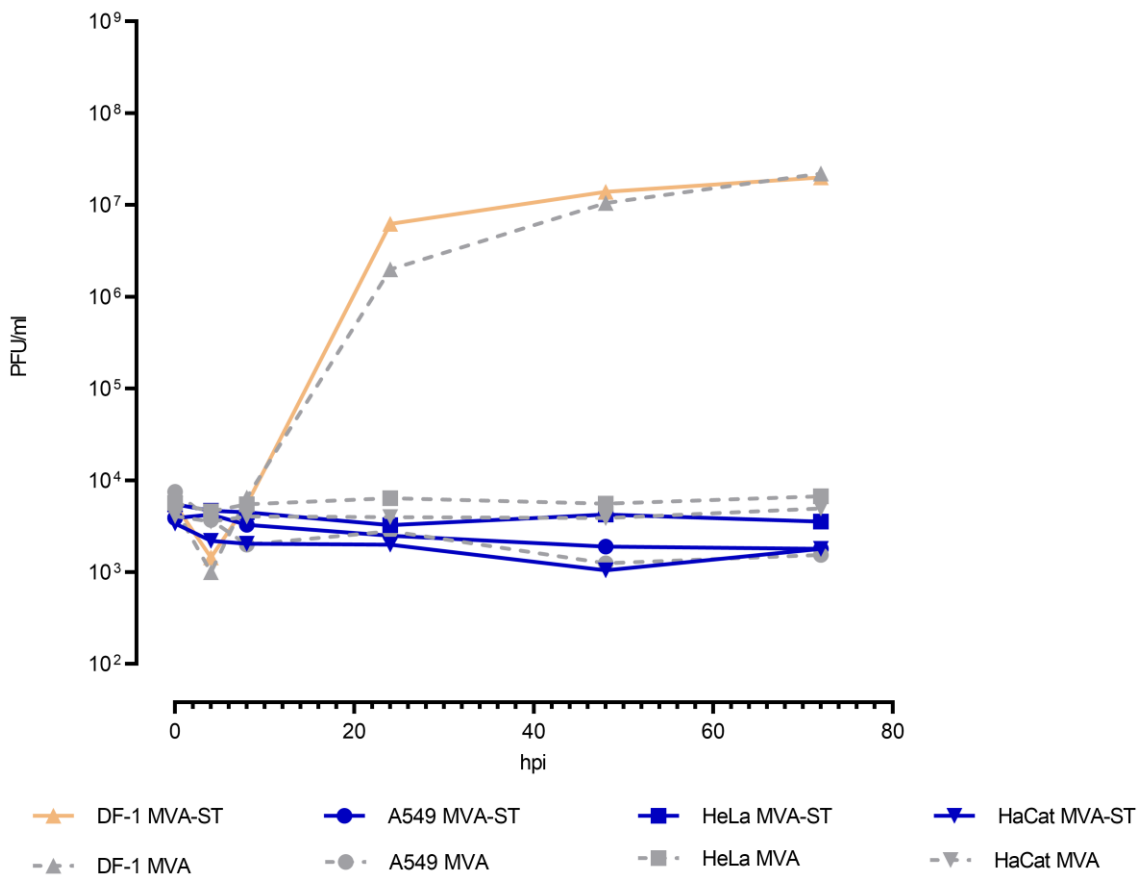

**Supplemental Figure 2. Multiple-step growth analysis of recombinant MVA-ST and MVA.** Cells were infected at a multiplicity of infection (MOI) of 0.05 with MVA-ST or MVA and collected at the indicated time points. Titration was performed on CEF cells and plaque-forming units (PFU) were determined. MVA-ST and MVA could be efficiently amplified on DF-1 cells but failed to productively grow on cells of human origin (HaCat, HeLa and A549).

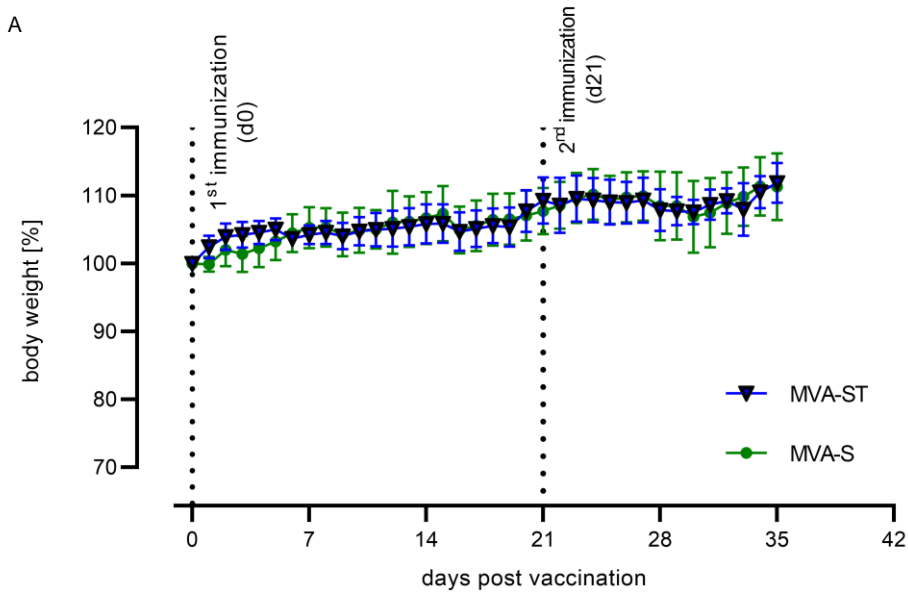

**B**

**Histopathological findings**  
(summary data)

Main groups Sex: female

| Group                     | 1                                                 |  |   | 2                         |     |     | 3                        |     |     |     |     |     |
|---------------------------|---------------------------------------------------|--|---|---------------------------|-----|-----|--------------------------|-----|-----|-----|-----|-----|
| Treatment                 | Vehicle                                           |  |   | MVA-SARS-2-ST prime boost |     |     | MVA-SARS-2-S prime boost |     |     |     |     |     |
| Dose                      |                                                   |  |   | 10*8 pfu/animal           |     |     | 10*8 pfu/animal          |     |     |     |     |     |
| Day of necropsy           | 35                                                |  |   | 35                        |     |     | 35                       |     |     |     |     |     |
| Grading                   | 1                                                 |  | 2 | 1                         |     | 2   | 1                        |     | 2   |     |     |     |
| <b>Organs:</b>            | <b>Microscopic findings:</b>                      |  |   |                           |     |     |                          |     |     |     |     |     |
| Adrenal gland             | No finding(s)                                     |  |   | 6/6                       | 0/6 | 0/6 | 8/8                      | 0/8 | 0/8 | 8/8 | 0/8 | 0/8 |
| Kidney, L                 | No finding(s)                                     |  |   | 6/6                       | 0/6 | 0/6 | 8/8                      | 0/8 | 0/8 | 8/8 | 0/8 | 0/8 |
| Liver                     | Lymphoid cell infiltration, periportal, focal     |  |   | 4/6                       | 2/6 | 0/6 | 6/8                      | 2/8 | 0/8 | 8/8 | 0/8 | 0/8 |
| Lungs                     | Prominent BALT                                    |  |   | 5/6                       | 1/6 | 0/6 | 7/8                      | 1/8 | 0/8 | 7/8 | 1/8 | 0/8 |
| Ln. subiliacus, L         | Lymphoid hyperplasia                              |  |   | 3/3                       | 0/3 | 0/3 | 0/8                      | 8/8 | 0/8 | 0/7 | 7/7 | 0/7 |
| Ln. ischiadicus, L        | Lymphoid hyperplasia                              |  |   | 5/5                       | 0/5 | 0/5 | 5/8                      | 3/8 | 0/8 | 6/7 | 1/7 | 0/7 |
| Ln. popliteus, L          | Lymphoid hyperplasia                              |  |   | 6/6                       | 0/6 | 0/6 | 0/7                      | 7/7 | 0/7 | 0/8 | 8/8 | 0/8 |
| Ln. iliacus medialis, L   | Lymphoid hyperplasia                              |  |   | 5/5                       | 0/5 | 0/5 | 0/7                      | 7/7 | 0/7 | 0/8 | 8/8 | 0/8 |
| Thymus                    | No finding(s)                                     |  |   | 6/6                       | 0/6 | 0/6 | 8/8                      | 0/8 | 0/8 | 8/8 | 0/8 | 0/8 |
| Spleen                    | No finding(s)                                     |  |   | 6/6                       | 0/6 | 0/6 | 8/8                      | 0/8 | 0/8 | 8/8 | 0/8 | 0/8 |
| Site of administration, L | Mixed cell infiltration, interstitial, multifocal |  |   | 6/6                       | 0/6 | 0/6 | 4/8                      | 4/8 | 0/8 | 4/8 | 4/8 | 0/8 |
| Site of administration, L | Necrosis, myofibres                               |  |   | 6/6                       | 0/6 | 0/6 | 7/8                      | 1/8 | 0/8 | 8/8 | 0/8 | 0/8 |
| Site of administration, L | Degeneration, myofibres                           |  |   | 4/6                       | 2/6 | 0/6 | 0/8                      | 8/8 | 0/8 | 0/8 | 8/8 | 0/8 |

# No. of animals affected / total No. of animals.

**Supplemental Figure 3. MVA-ST and MVA-S immunization and monitoring for side effects.** (A) Groups of BALB/c mice were vaccinated twice with  $10^8$  PFU MVA-ST and MVA-S via the intramuscular route using a prime-boost schedule (21-day interval). Shown are body weight changes of mice after prime-boost vaccination with MVA-ST or MVA-S. Body weights was measured daily. No side effects were observed. (B) MVA-ST and MVA-S immunization schedules and monitoring for side effects, continuation. Histopathological examinations in prime-boost vaccinated animals. L = Left side. No lesions could be attributed to MVA-ST or MVA-S inoculation in any tissue other than the injection site and draining lymph nodes. Systemic effects related to vaccination were not seen. Signs of minimal to mild myodegeneration at the injection site were observed in treated and control mice. Local inflammation of the myofiber interstitium and the adjacent adipose tissue was observed and interpreted as part of the physiological immune reaction to the vaccine virus as a consequence of the treatment procedure. The degree and extent of inflammation, myodegeneration and necrosis was in accordance with the ratio of inoculum volume in relation to the administration site.





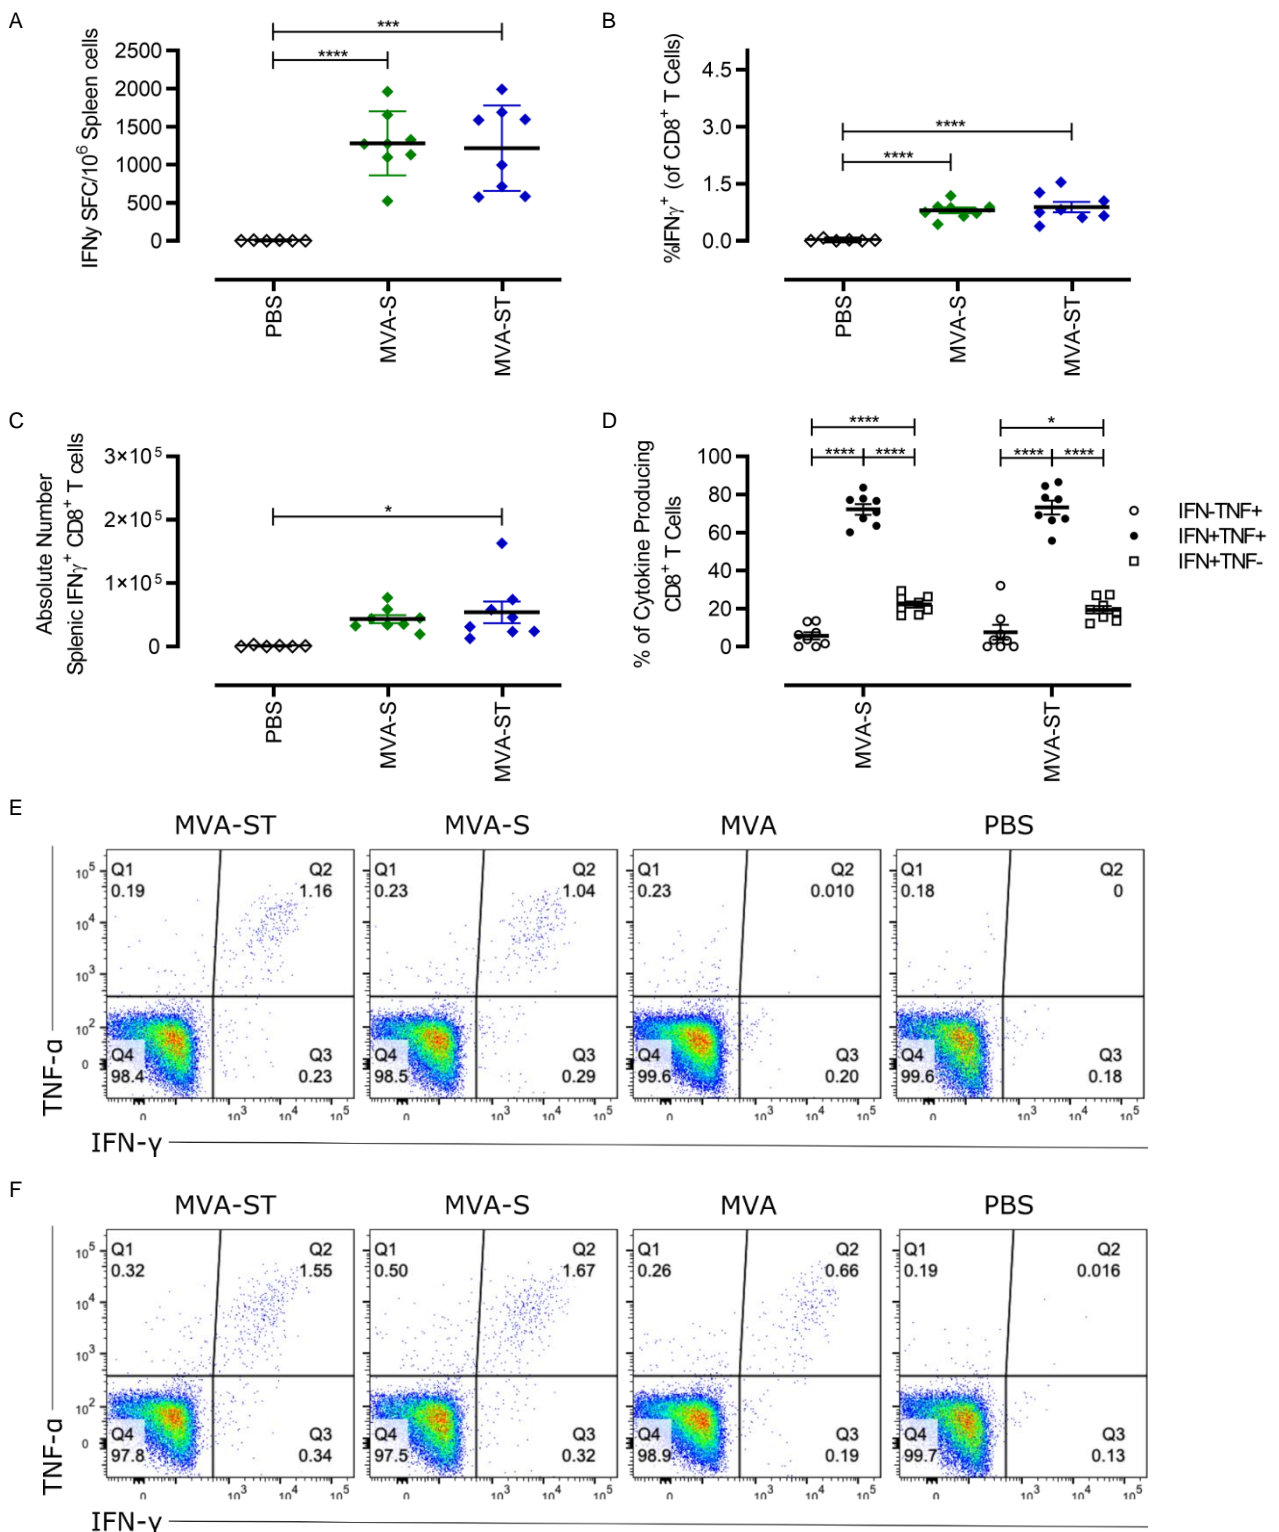

**Supplemental Figure 5. Activation of MVA-specific CD8<sup>+</sup> T cells after prime-boost immunization (21-day interval) with MVA-ST and MVA-S.** Groups of BALB/c mice (n = 6 to 8) were immunized twice with 10<sup>8</sup> PFU MVA-ST and MVA-S over 21-day interval via the i.m. route. Mock immunized mice (PBS) served as controls. Splenocytes were collected and prepared 14 days after the 2nd immunization. Total splenocytes were stimulated with the H2d restricted MVA-specific peptide F2(G)<sub>26-34</sub> and measured by IFN- $\gamma$  ELISPOT assay and IFN- $\gamma$  and TNF- $\alpha$  ICS plus FACS analysis. (A) IFN- $\gamma$  spot forming colonies (SFC) for stimulated splenocytes measured by ELISPOT assay. (B and C) IFN- $\gamma$  production by CD8<sup>+</sup> T cells measured by FACS analysis. Graphs show the frequency and absolute number of IFN- $\gamma$ + CD8<sup>+</sup> T cells. (D) Cytokine profile of F2(G)<sub>26-34</sub>-specific CD8<sup>+</sup> T cells. Graphs show the mean frequency of IFN- $\gamma$ -TNF- $\alpha$ +, IFN- $\gamma$ +TNF- $\alpha$ + and IFN- $\gamma$ +TNF- $\alpha$ - cells within the cytokine positive CD8 T cell compartment. Representative flow cytometry plots for (E) S<sub>268-276</sub> and (F) F<sub>26-34</sub> stimulated splenocytes. \* p < 0.05, \*\*\* p < 0.001, \*\*\*\* p < 0.0001. One-way ANOVA and Tukey's multiple comparisons test. 18

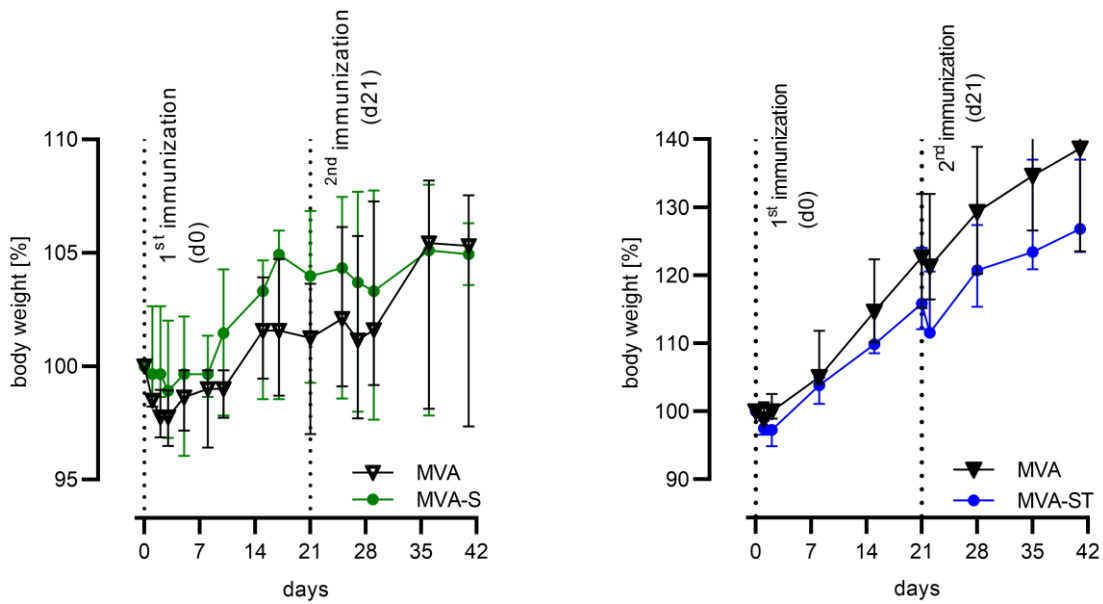

**Supplemental Figure 6. MVA-ST and MVA-S immunization and monitoring for side effects.** Hamsters were vaccinated with  $10^8$  PFU MVA-ST and MVA-S via the intra muscular route using a prime-boost schedule (21-day interval). Body weight changes in hamsters after prime-boost vaccination with MVA-ST or MVA-S. Body weight was measured daily. No side effects were observed.

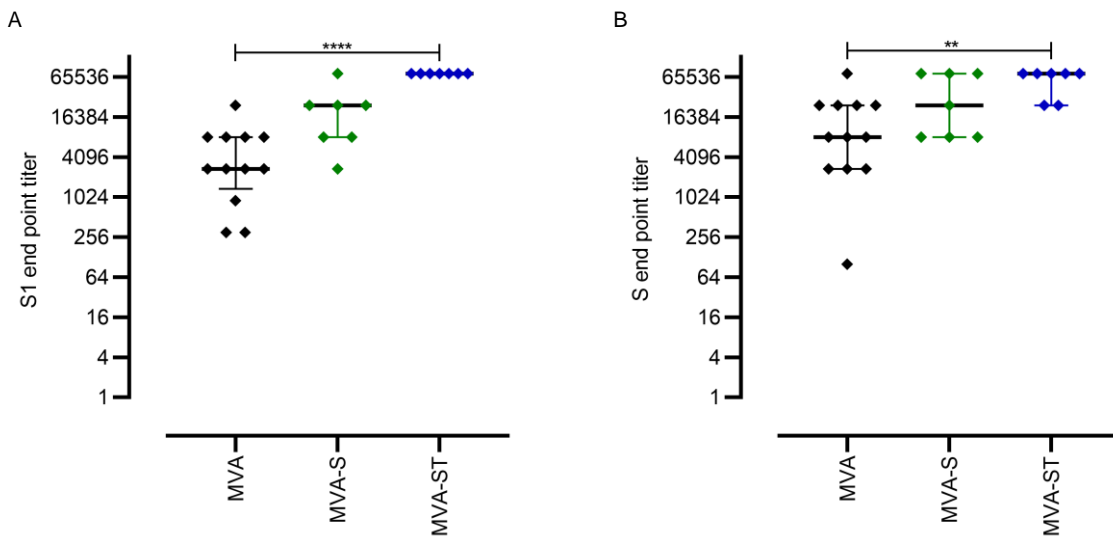

**Supplemental Figure 7. Antigen-specific humoral immunity induced in MVA-S or MVA-ST vaccinated hamsters after SARS-CoV-2 BavPat1 challenge infection.** Sera collected on day 55 were analyzed for SARS-CoV-S (A) S1-specific IgG antibodies and (B) full-length S-specific IgG antibodies targeting the BavPat1 SARS-CoV-2 S. \*\*  $p < 0.01$ , \*\*\*\*  $p < 0.0001$ . Kruskal-Wallis test and Dunn's multiple comparisons test.
